# Supplementary material for: Synthesis and anionophoric activities of dimeric polyamine–sterol conjugates: the impact of rigid vs. flexible linkers
Source: Royal Society of Chemistry journal article supplement (doi:10.1039/c3ob41969j), 2013-01-01
Supplement: c3ob41969j.pdf [file c3ob41969j.pdf]

## Supporting Information

# Synthesis and anionophoric activities of dimeric polyamine-sterol conjugates: the impact of rigid vs flexible linkers

Yong-Ming Lu,<sup>a</sup> Li-Qun Deng,<sup>a</sup> Xi Huang,<sup>a</sup> Jin-Xiang Chen,<sup>a</sup> Bo Wang,<sup>b</sup> Zhong-Zhen Zhou,<sup>a</sup> Guan-Song Hu<sup>a</sup> and Wen-Hua Chen

\*. <sup>a</sup>

<sup>a</sup> *School of Pharmaceutical Sciences, Southern Medical University, Guangzhou 510515, P. R. China*

<sup>b</sup> *School of Chemistry and Chemical Engineering, Sun Yat-Sen University, Guangzhou 510275, P. R. China*

Figures S1~6. <sup>1</sup>H NMR spectra of compounds **1-4** and boc-protected **2**; and <sup>13</sup>C NMR spectrum of compound **2**.

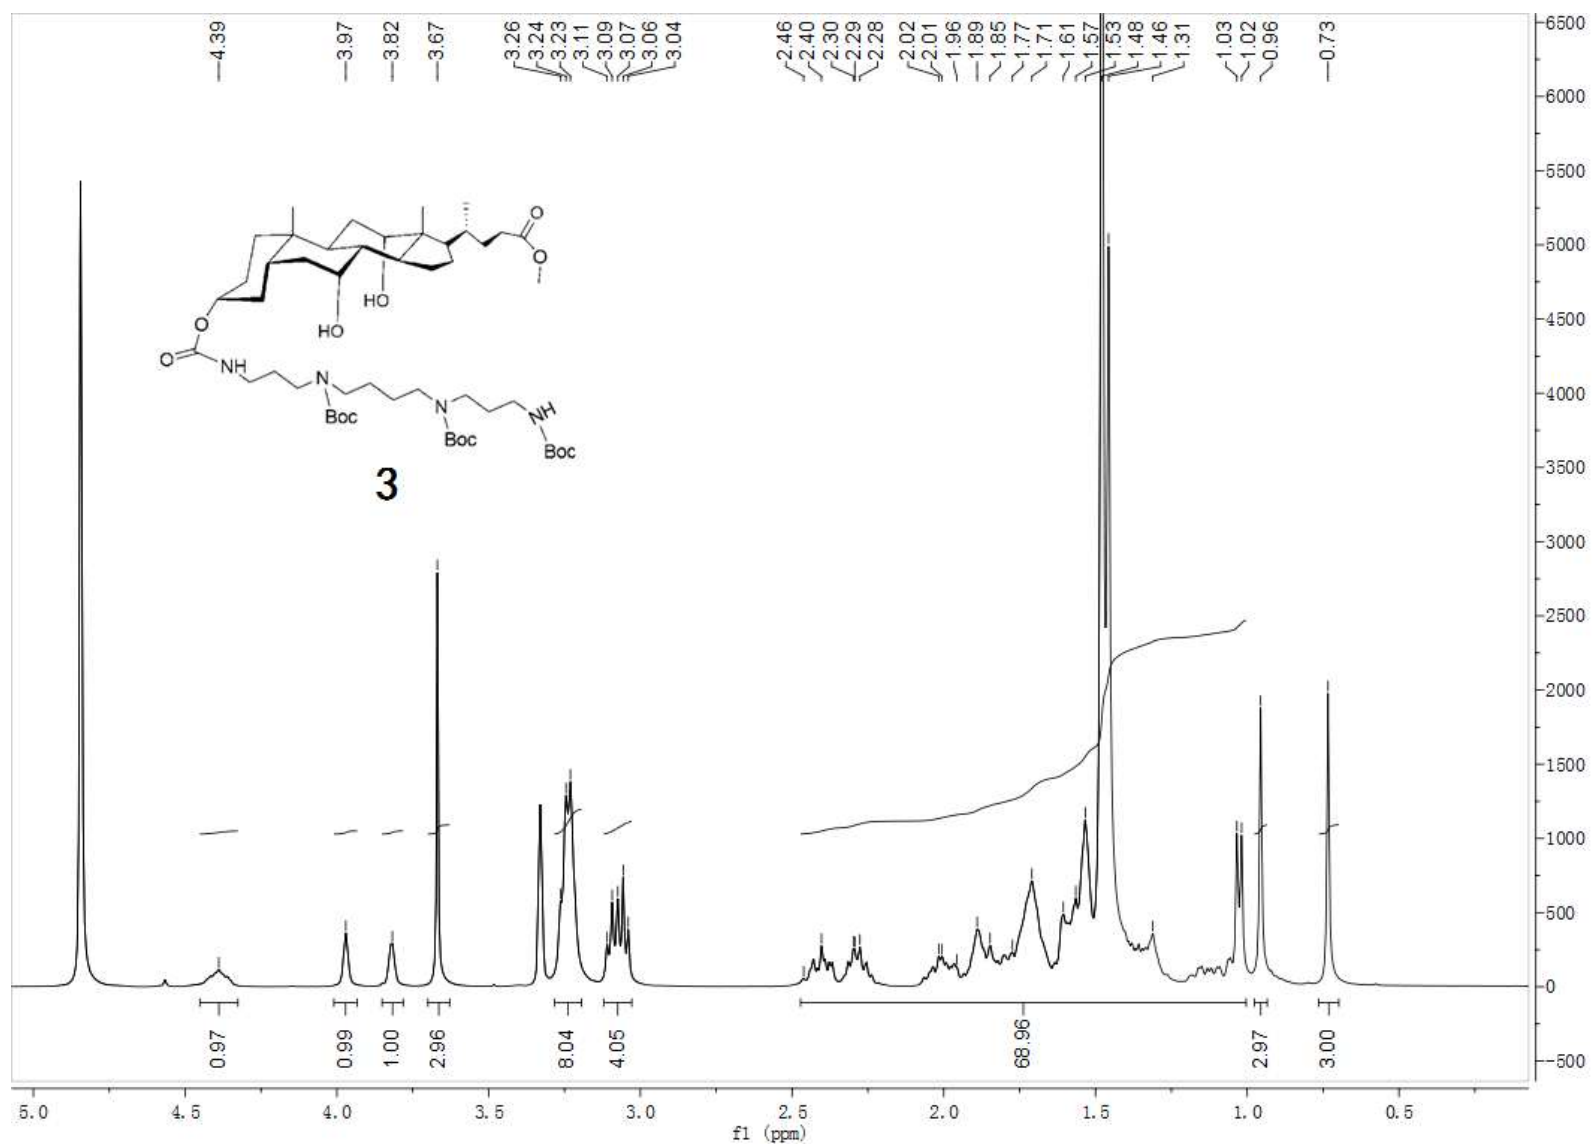

Figure S1. <sup>1</sup>H NMR spectrum (400 MHz, CD<sub>3</sub>OD) of compound **3**.

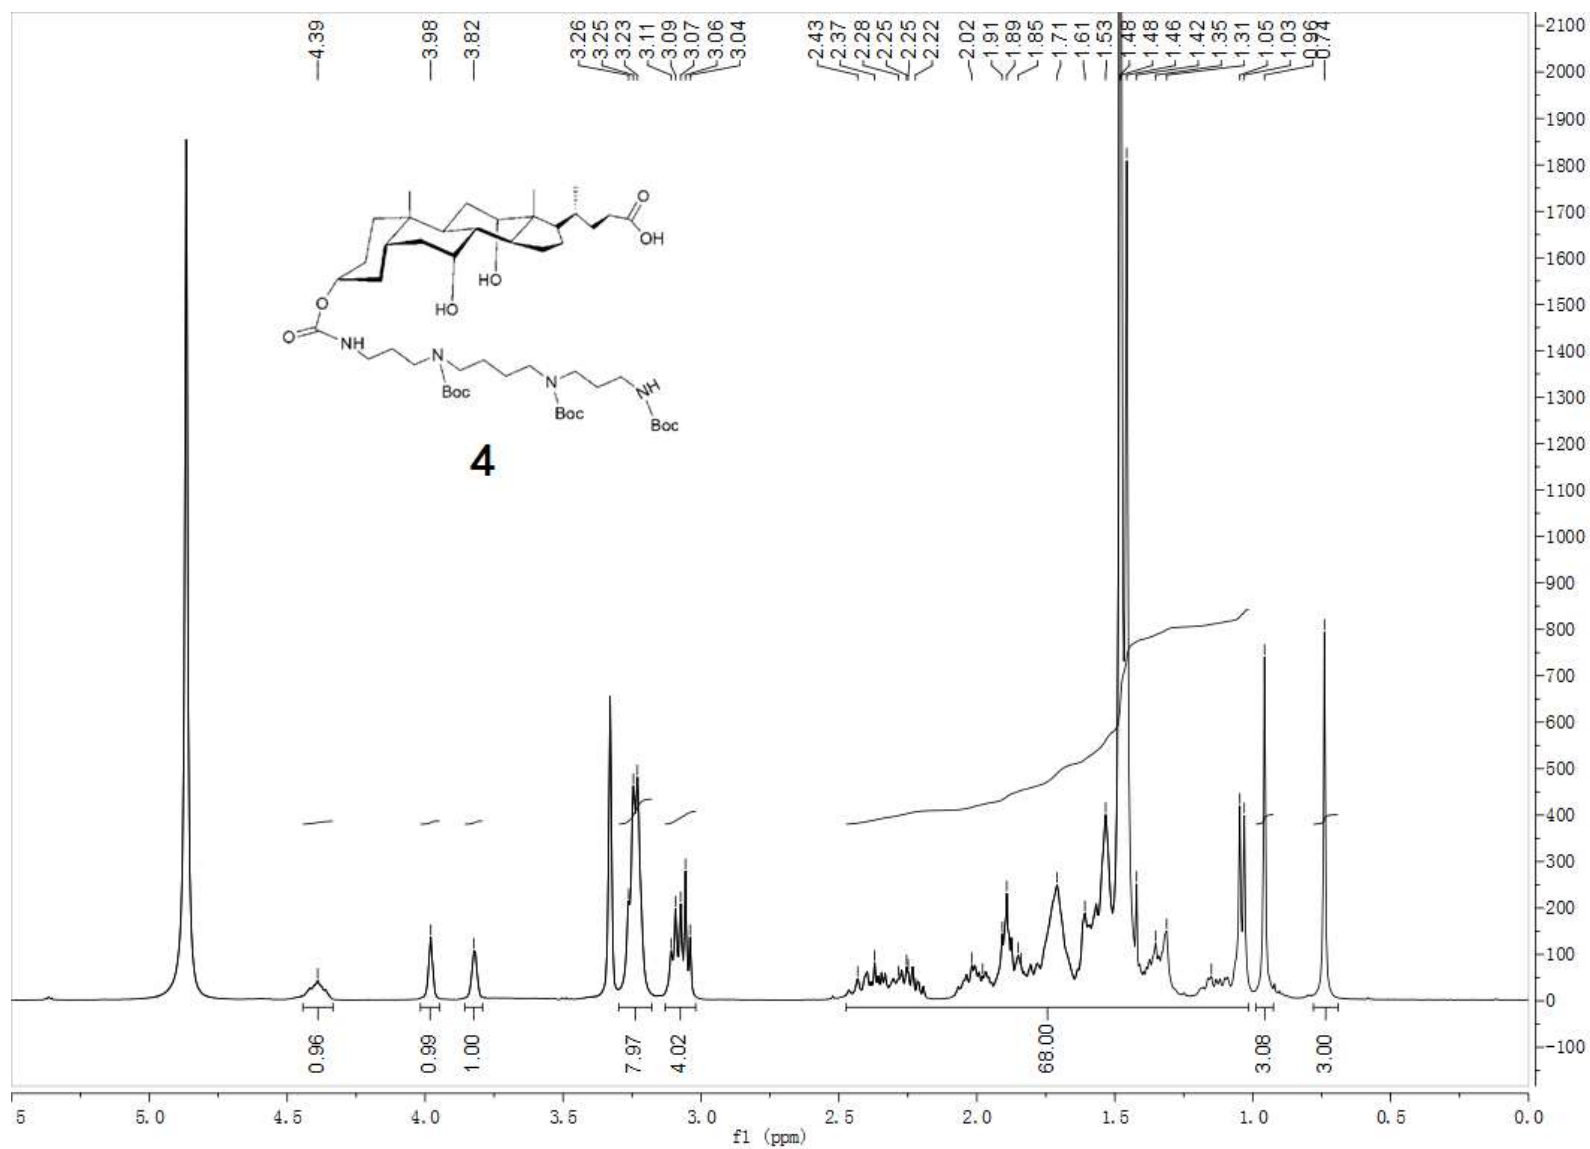

Figure S2. <sup>1</sup>H NMR spectrum (400 MHz, CD<sub>3</sub>OD) of compound 4.

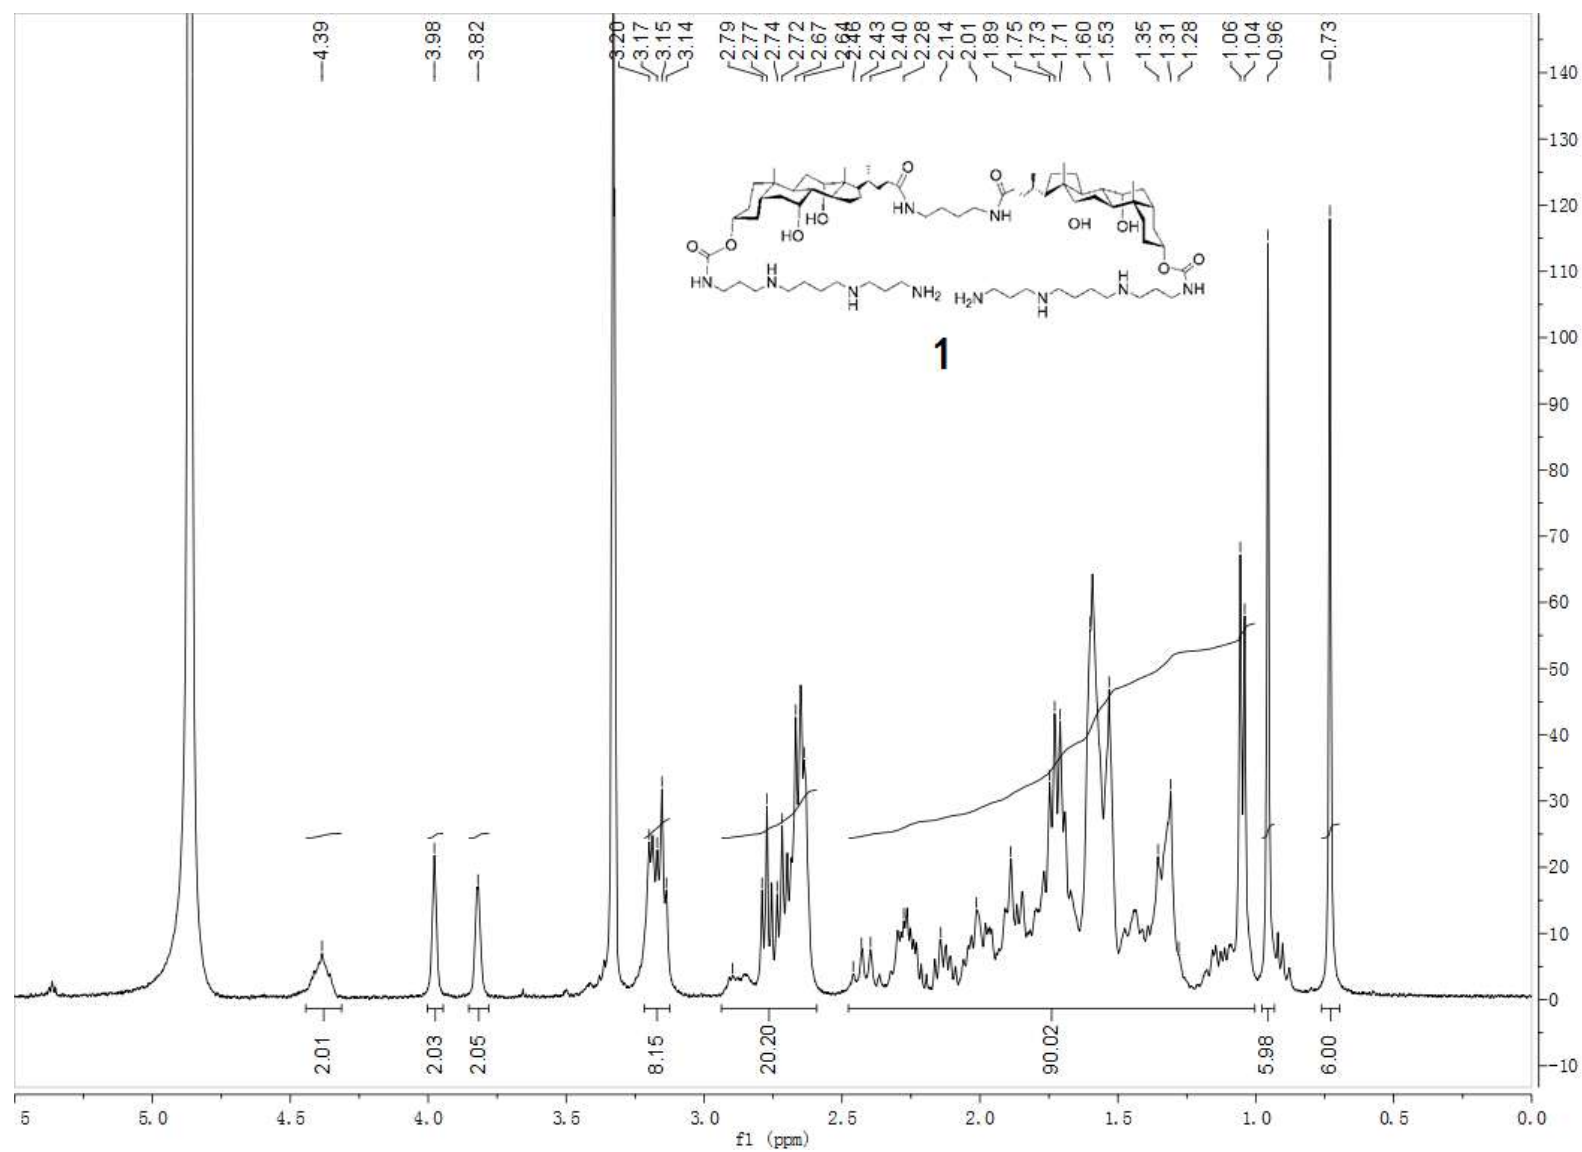

Figure S3. <sup>1</sup>H NMR spectrum (400 MHz, CD<sub>3</sub>OD) of compound **1**.

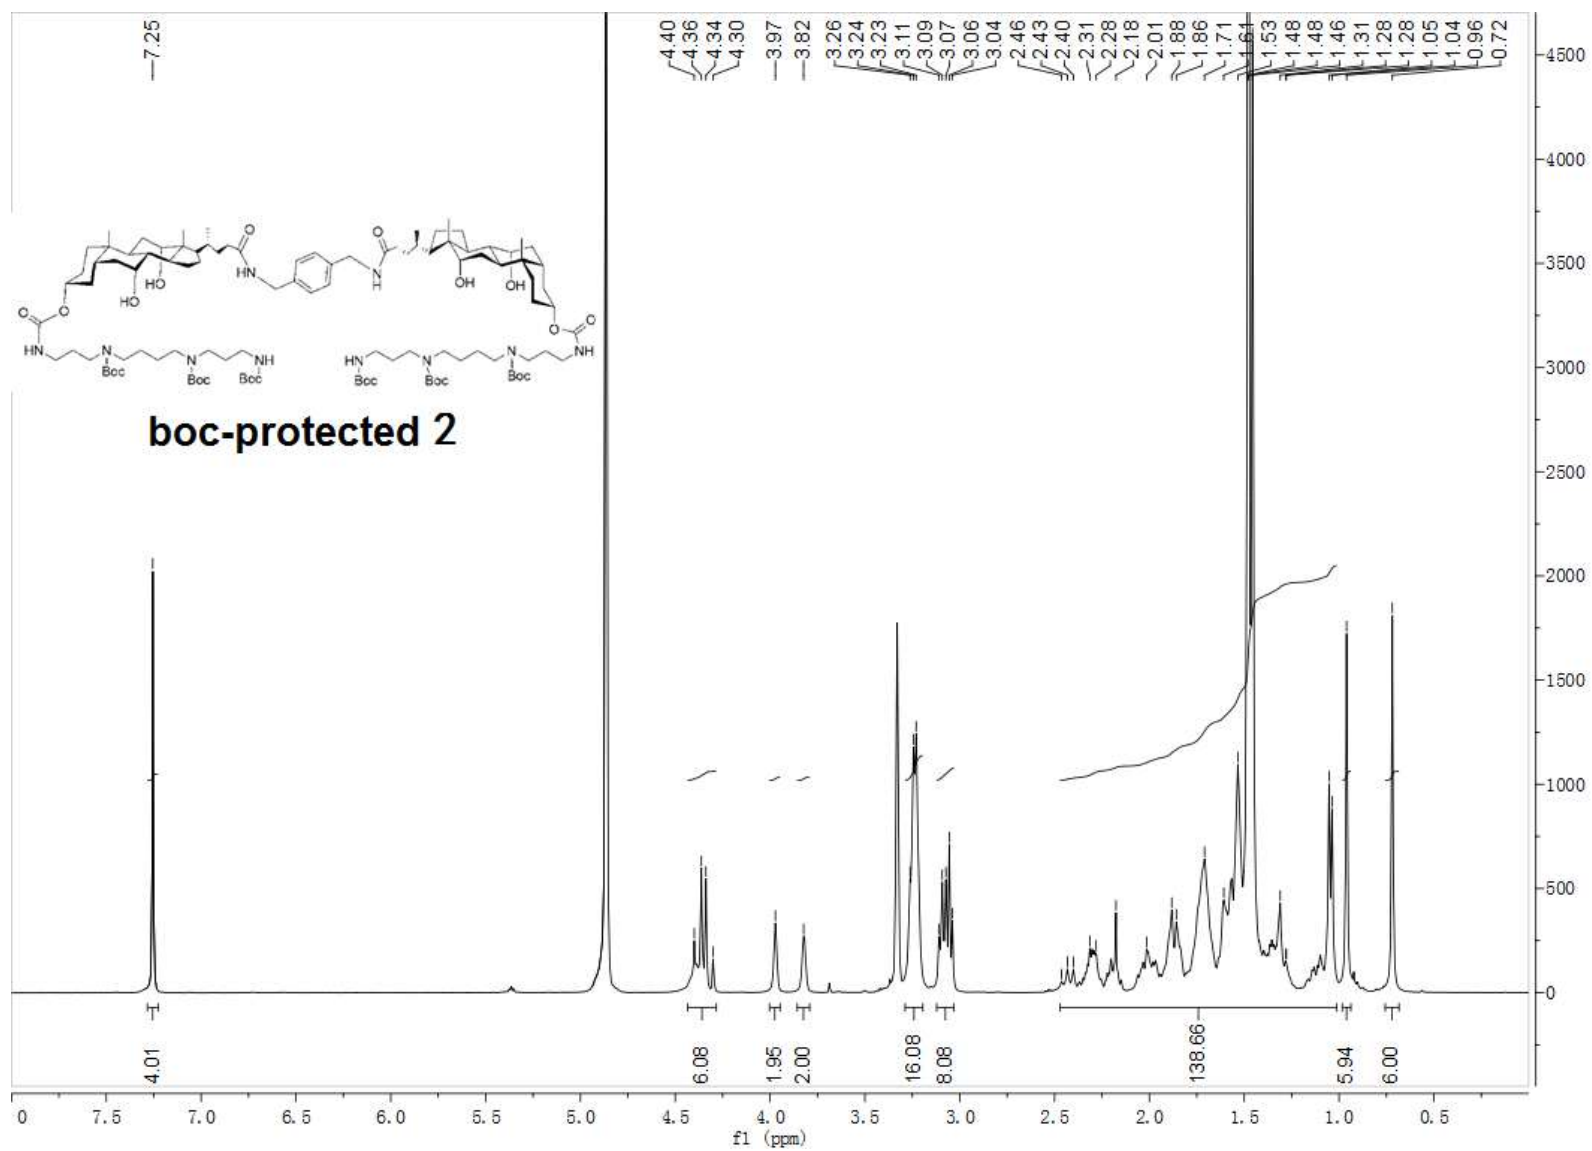

Figure S4.  $^1\text{H}$  NMR spectrum (400 MHz,  $\text{CD}_3\text{OD}$ ) of boc-protected **2**.

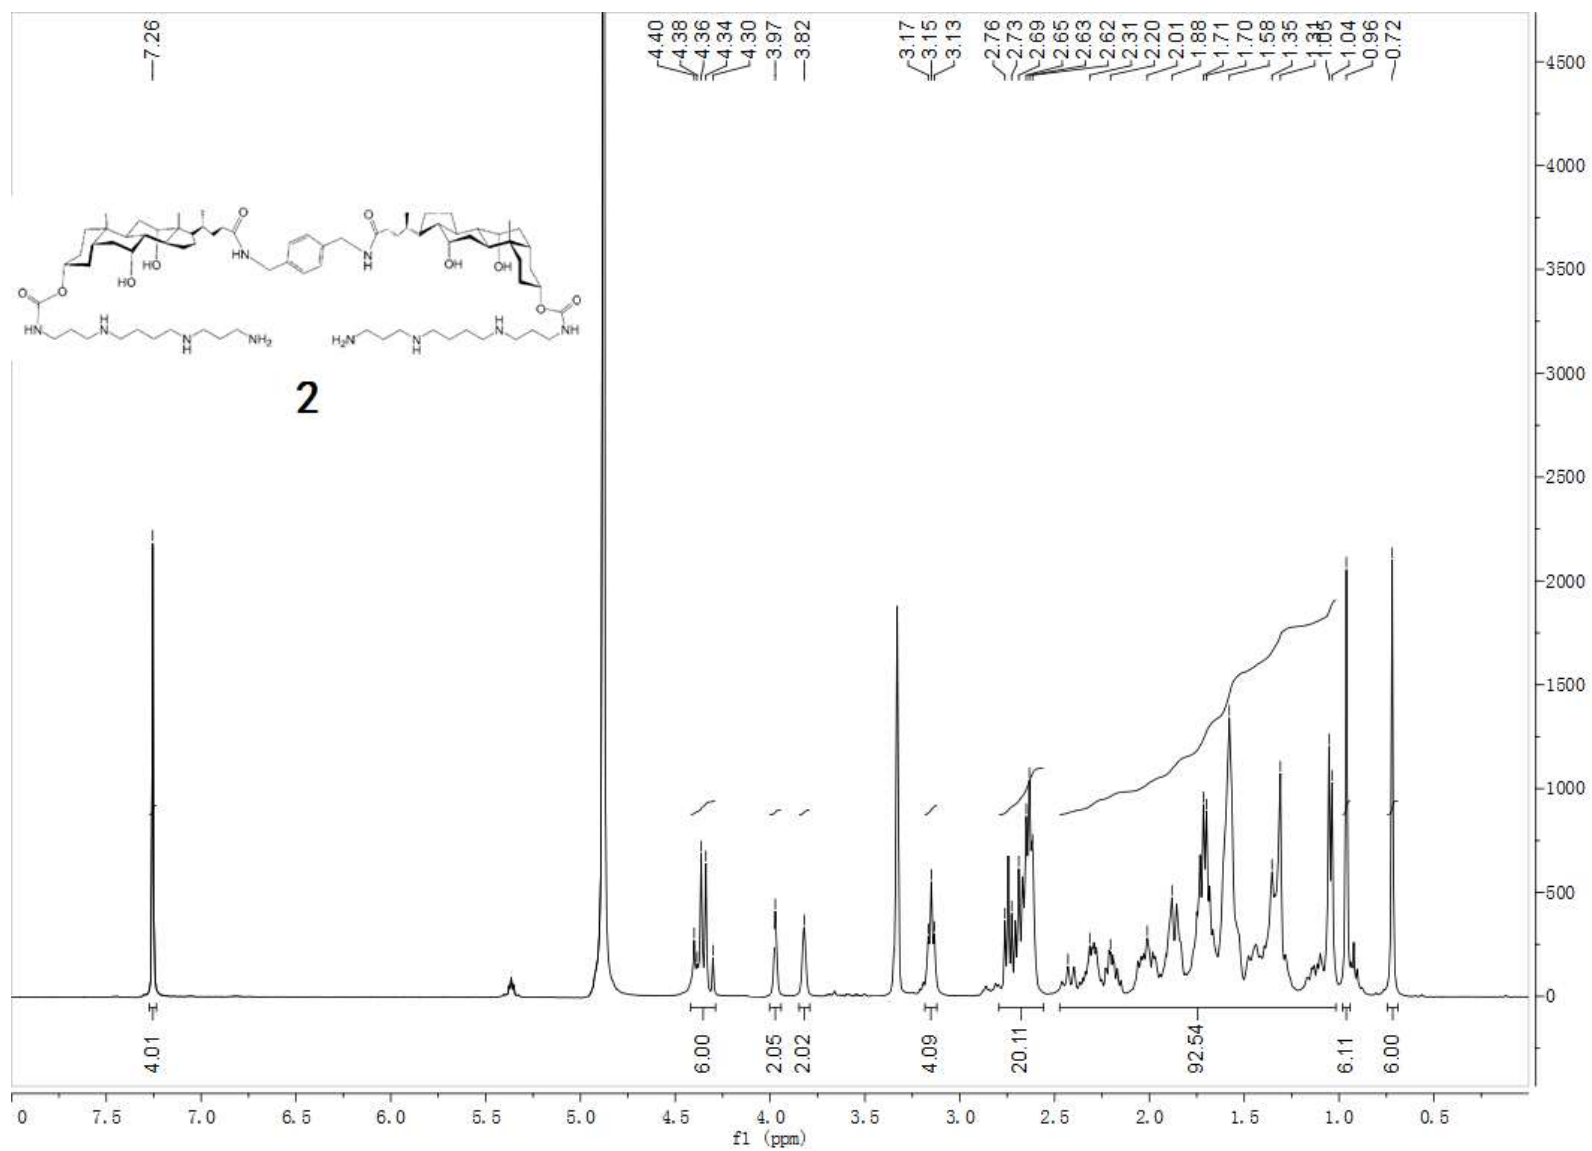

Figure S5. <sup>1</sup>H NMR spectrum (400 MHz, CD<sub>3</sub>OD) of compound **2**.

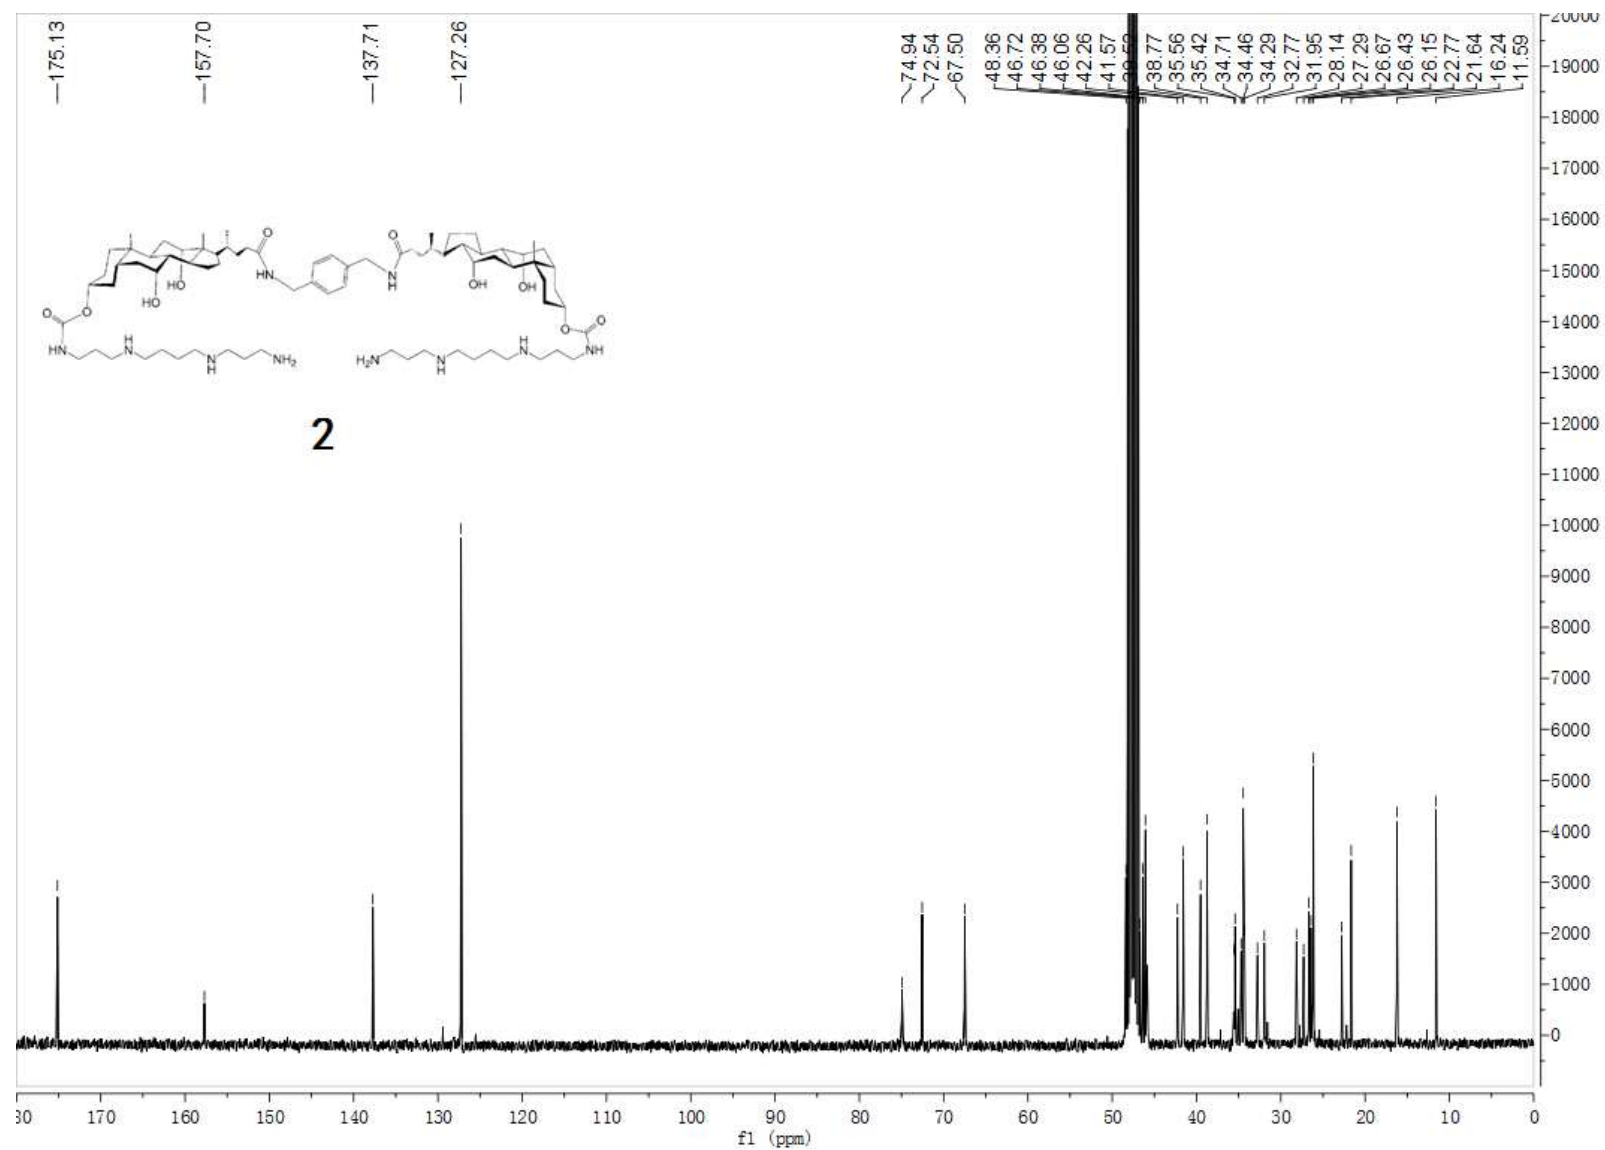

Figures S6.  $^{13}\text{C}$  NMR spectrum (100 MHz,  $\text{CD}_3\text{OD}$ ) of compounds **2**.
